# Supplementary material for: A comparison of gene expression and DNA methylation patterns across tissues and species
Source: HighWire-hosted journal article supplement (doi:10.1101/gr.254904.119), 2020-01-17
Supplement: Supplemental_code.zip [file GTEx_individuals.docx]

[1] "GTEX.111FC" "GTEX.111YS" "GTEX.117YW" "GTEX.117YX"

"GTEX.11DXZ" "GTEX.11LCK" "GTEX.11TT1" "GTEX.11TUW"

[2] "GTEX.11ZUS" "GTEX.1212Z" "GTEX.12584" "GTEX.12BJ1"

"GTEX.12ZZW" "GTEX.12ZZY" "GTEX.131XE" "GTEX.131XH"

[3] "GTEX.132NY" "GTEX.132QS" "GTEX.13FHP" "GTEX.13FLV"

"GTEX.13FTZ" "GTEX.13JVG" "GTEX.13NYB" "GTEX.13O21"

[4] "GTEX.13O3P" "GTEX.13O61" "GTEX.13OVG" "GTEX.13OVL"

"GTEX.13OW5" "GTEX.13OW6" "GTEX.13OW8" "GTEX.13PVQ"

[5] "GTEX.13RTJ" "GTEX.13S86" "GTEX.145MN" "GTEX.145MO"

"GTEX.147F4" "GTEX.147JS" "GTEX.148VJ" "GTEX.1497J"

[6] "GTEX.14BIL" "GTEX.14C39" "GTEX.14C5O" "GTEX.14E1K"

"GTEX.14E6C" "GTEX.14E6D" "GTEX.14E7W" "GTEX.14JG1"

[7] "GTEX.14JIY" "GTEX.14PJ4" "GTEX.15RJ7" "GTEX.15SHW"

"GTEX.17GQL" "GTEX.17HGU" "GTEX.17KNJ" "GTEX.17MF6"

[8] "GTEX.1AX8Z" "GTEX.1AX9I" "GTEX.1AX9J" "GTEX.1AX9K"

"GTEX.1AYCT" "GTEX.1B8L1" "GTEX.1B996" "GTEX.QDVJ"

"GTEX.QESD" "GTEX.QV44" "GTEX.R55C" "GTEX.REY6"

"GTEX.RN64" "GTEX.T6MN" "GTEX.U8XE" "GTEX.UJMC"

"GTEX.V1D1" "GTEX.WFG7" "GTEX.WFG8" "GTEX.WFON"

"GTEX.WHPG" "GTEX.WY7C" "GTEX.WYJK" "GTEX.WZTO"

"GTEX.X261" "GTEX.X3Y1" "GTEX.XBEC" "GTEX.XBED"

[85] "GTEX.XGQ4" "GTEX.XPVG" "GTEX.XQ8I" "GTEX.Y3I4" "GTEX.Y5V6" "GTEX.Y8E4"

[91] "GTEX.YEC4" "GTEX.YF7O" "GTEX.ZAB4" "GTEX.ZAB5" "GTEX.ZDTT" "GTEX.ZDXO"

[97] **"GTEX.ZDYS" "GTEX.ZEX8" "GTEX.ZG7Y" "GTEX.ZPU1"**

"GTEX.ZUA1" "GTEX.ZYT6"

[103] "GTEX.ZYW4"
